# Supplementary material for: Epitaxial facet junctions on TiO2 single crystals for efficient photocatalytic water splitting
Source: Royal Society of Chemistry journal article supplement (doi:10.1039/c7ee03482b), 2018-01-01
Supplement: c7ee03482b1.pdf [file c7ee03482b1.pdf]

## Supporting Information for

### Epitaxial facet junction on TiO<sub>2</sub> single crystals for efficient photocatalytic water splitting

#### Methods

**Catalyst preparation.** The shape-tailored TiO<sub>2</sub> SCs were prepared using a solvothermal method. The shape-tailored TiO<sub>2</sub> SCs with dominant high-energy {001} polar facets were prepared using a facile solvothermal method. Briefly, HF aqueous solution (0.0, 1.5, 3.0, 4.5, 6.0 and 9.0 mL, respectively, 40 wt.%) and distilled water (15.0, 13.5, 12.0, 10.5, 9.0 and 6.0 mL, respectively) were carefully and slowly dosed into 25-mL tetrabutyl titanate, and magnetically stirred for 0.5 h in a 60-mL Teflon autoclave. Later, the slight yellow precursor was kept at 180 °C for 24 h. After cooled to ambient temperature, the white powders were repeatedly washed with ethanol, 0.1 M NaOH aqueous solution and distilled water to remove the surface fluorine, and then dried at 60 °C for usage. The polycrystalline TiO<sub>2</sub> particles dominantly exposed by low-energy {101} facets were prepared as reference without HF. TiO<sub>2</sub> SCs were characterized in terms of morphology and structures, and their photochemical properties were evaluated in a three-electrode system either in dark or under UV irradiation.

**Characterizations of TiO<sub>2</sub> SCs.** The morphology and structure of TiO<sub>2</sub> SCs were characterized by field-emission scanning electron microscope (FE-SEM, SIRION200, FEI Co., the Netherlands), high-resolution transmission electron microscope and selected-area electron diffraction (HRTEM/SAED, JEM-2100, JEOL Co., Japan) and scanning transmission electron microscope (STEM, JEM-ARM200F, JEOL Co., Japan). N<sub>2</sub> adsorption-desorption experiments were conducted at 77 K to examine the Brunauer-Emmett-Teller surface area (BELsorp II mini, BEL Inc., Japan). Before measuring, the TiO<sub>2</sub> samples were degassed in a vacuum at 100 °C for 12 h. X-ray diffraction (XRD, X'Pert, PAN analytical BV, the Netherlands) was used to analyze the crystal structure. The diffuse

reflectance spectra (DRS) were measured on a UV/Vis spectrophotometer (UV 2550, Shimadzu Co., Japan). The chemical compositions and valance band spectra were characterized by X-ray photoelectron spectroscopy (XPS, PHI 5600, Perkin-Elmer Inc., USA), respectively. A FP-6500 spectrofluorometer (Jasco Co., Japan) was used to record the PL spectra of TiO<sub>2</sub> SCs and TiO<sub>2</sub> PCs. The excitation wavelength was set at 360 nm.

**Preparation of TiO<sub>2</sub> photoelectrodes.** Deposition of the TiO<sub>2</sub> samples onto the commercial ITO glass to fabricate electrochemical and photo-electrochemical electrodes was performed using the facile method reported previously. Briefly, the commercial ITO glass used as substrate were successively cleaned in distilled water, absolute ethanol and isopropanol by ultrasonication for 15 min, then dried at 60 °C in vacuum. 5 mg of TiO<sub>2</sub> photocatalyst and 10 µL of Nafion solution (5.0 wt%) were dispersed in 1-mL water/isopropanol mixed solvent (3:1 v/v) by at least 30 min sonication to prepare a homogeneous catalyst suspended colloid. Then, 150 µL of the obtained milk-like viscous catalyst colloid was uniformly spread onto the clean ITO glass of ~6.0 cm<sup>2</sup> (4.0 × 1.5 cm), by the doctor blade method and then was dried in air to form the working photochemical electrode. After evaporation of ethanol at 120 °C, the samples were heated to 430 °C in a muffle furnace for 2.0 h to completely remove the organic binder and sinter TiO<sub>2</sub> film onto ITO glass. In this process, the ink was dried slowly in open air and the drying conditions were adjusted by trial and error until a uniform catalyst distribution across the electrode surface was obtained. The TiO<sub>2</sub> sample spread uniformly and tightly, indicating that the ITO glass substrate might interact with TiO<sub>2</sub> SCs through physical adsorption, electrostatic binding or charge transfer interaction, and prevent their

severe aggregation. The prepared electrode had a  $\sim 0.30$  mg  $\text{TiO}_2$  dosage ( $0.05 \text{ mg/cm}^2 \times 6 \text{ cm}^2$ ) on the ITO glass support, and was stable for the electrochemical and photo-electrochemical measurements under the given conditions.

**Electrochemical and photo-electrochemical measurements.** All electrochemical and photo-electrochemical properties of  $\text{TiO}_2$  samples were measured in a conventional three-electrode measuring system, with the  $\text{TiO}_2$  coated ITO glass as the working electrode, platinum sheet as the counter electrode and standard calomel electrode (SCE) as the reference electrode, by using a commercial electrochemical workstation (CHI 760D, CH Instrument, China). Electrochemical impedance spectroscopy of different  $\text{TiO}_2$  samples was measured by applying an AC voltage amplitude of 5 mV within a frequency range from  $10^5$  to  $10^{-2}$  Hz in 0.1 M  $\text{Na}_2\text{SO}_4$  aqueous solution, with different external potentials and UV illumination.

The photochemical properties were evaluated by the short-circuit photocurrent, the linear sweep voltammogram and the cyclic voltammetry with 0.1 M  $\text{Na}_2\text{SO}_4$  aqueous solution under UV irradiation (200-400 nm) in a three-electrode system using a computer-controlled potentiostat (CHI 760D, CH Instrument, China). In the tests,  $\text{TiO}_2$  samples or commercial ITO glass was used as the working electrode, platinum sheet as the counter electrode and standard calomel electrode (SCE) as the reference electrode (Scheme S1). The light source was a 350 W Xe arc lamp (PLS-SXE350, Beijing Trust Tech Co., China), with a 10 cm infrared water filter and a Pyrex filter ( $\lambda > 200$  nm). In the transition photocurrent tests, the pulse photocurrent with ON/OFF cycles was measured at an applied potential of +0.3 V versus SCE under UV irradiation or in dark. The working electrode was cycled at least 15 times before electrochemical data were recorded, then a continuous or chopped UV irradiation was maintained to activate  $\text{TiO}_2$  samples and generate photo-carriers.

**Water splitting test.** Photochemical  $\text{H}_2$  evolution test was carried out on Pt-loaded  $\text{TiO}_2$  in a Pyrex reaction cell with gas circulation and evacuation system. A 300-W Xe lamp (PLS-SXE300/300UV, Trusttech Co., China) covered with a water-cooled quartz jacket was used as

light source.  $\text{TiO}_2$  sample (0.2 g) was suspended in a mixed solution of  $\text{H}_2\text{O}$  (80 mL) and  $\text{CH}_3\text{OH}$  (20 mL). Pt (0.5~3.0 wt%) was deposited onto  $\text{TiO}_2$  from  $\text{H}_2\text{PtCl}_6 \cdot 6\text{H}_2\text{O}$  under UV irradiation (15 min).  $\text{H}_2$  amount was in-situ measured using on-line gas chromatography (GC7890, TCD, molecular sieve 5 Å,  $\text{N}_2$  carrier, Shanghai Techcomp Co., China).

**DFT studies.** The first-principles calculations were performed using the DMol package. All calculations were all-electron ones with scalar relativistic corrections. The exchange-correlation interaction was treated by the Perdew-Burke-Ernzerhof (PBE) functional generalized gradient approximation. The basis set consisted of the double numerical atomic orbitals augmented by polarization functions. Along the  $b$  axis, the periodic boundary condition was applied. The real-space global cutoff radii were chosen to be 4.3 Å, while the Monkhorst-Pack  $1 \times 5 \times 1$  k-points were used for geometry optimization, total energy, and band structure calculations to sample the Brillouin zone. As for the self-consistent electronic structure calculations, the convergence criterions on the energy and electron density are set to be  $10^{-6}$  Hartree (1 Hartree = 1 atomic unit = 27.21 eV). Geometry optimizations are performed with convergence criteria of  $2 \times 10^{-3}$  Hartree/Å on the gradient,  $5 \times 10^{-3}$  Å on the displacement, and  $1 \times 10^{-5}$  Hartree on the energy. To neglect their neighboring interaction, the distance between the neighboring unit cells is larger than 15.0 Å. The calculated crystal parameters of the unit cell of the bulk anatase  $\text{TiO}_2$  are  $a = 3.785$  Å and  $c = 9.486$  Å. The {001} facets expose two-fold coordinated, bridging O between two Ti atoms, with Ti-O-Ti angles of  $156^\circ$  together with uncapped, penta-coordinated Ti ions ( $\text{Ti}_{5c}$ ). The {001} anatase contains 5-fold coordinated Ti atoms ( $\text{Ti}_{5c}$ ) each with  $\text{O}_{2c}$  and  $\text{O}_{3c}$  on the surface. The {101} facet, which is the most stable and abundant surface in the equilibrium shape of the anatase  $\text{TiO}_2$  nanocrystals for reduction reactions, exhibits a saw tooth-like corrugation with  $\text{Ti}_{5c}$ ,  $\text{Ti}_{6c}$ ,  $\text{O}_{2c}$  and  $\text{O}_{3c}$  on the surface.

In previous investigations, the band edge positions ( $E_{\text{CBM}}$  and  $E_{\text{VBM}}$ ) of the isolated  $\text{TiO}_2$  {001} and {101} surfaces using slab models were determined according to the method of

Toroker<sup>14</sup>. By performing calculations for the bulk anatase TiO<sub>2</sub> using the PBE and HSE06 functionals, we verified that the band gap center (BGC), denoted  $E_{\text{BGC}}$ , is insensitive to the choice of the exchange-correlation functional. Thus, the less computationally expensive PBE functional was adopted in our DFT calculations to obtain  $E_{\text{BGC}}$ . Besides, the band gap calculated using the HSE06 functional was directly comparable to the experimental measurements. The band alignment was determined according to the calculated DOS results as shown in Fig. 4b. The VBM and CBM energy levels could be reliably determined by  $E_{\text{VBM}} = E_{\text{BGC}} - 1/2E_g$  and  $E_{\text{CBM}} = E_{\text{BGC}} + 1/2E_g$ , where  $E_{\text{BGC}}$  is the BGC position calculated using the PBE functional and  $E_g$  is set to be the experimental measured band gaps of 3.18 and 3.22 eV for TiO<sub>2</sub> (001) and (101) surfaces, respectively. Then, the VBM and CBM energy levels of the isolated {001} and {101} facets could be readily aligned relative to their vacuum levels, which are set to zero.

**Table S1** Main morphological and structural properties and their photochemical water splitting activities of the TiO<sub>2</sub> samples prepared with different F/Ti molar ratios in the solvothermal process.

| F/Ti ratio | HF dosage (mL) | Mean particle size (nm) <sup>a</sup> | Specific surface area (m <sup>2</sup> g <sup>-1</sup> ) <sup>b</sup> | Crystal phase | {001} percent (%) <sup>c</sup> | {001}/{101} exposed ratio <sup>d</sup> | Relative crystallinity <sup>e</sup> | Activity (μmol h <sup>-1</sup> g <sup>-1</sup> ) <sup>f</sup> | Specific activity (μmol h <sup>-1</sup> m <sup>-2</sup> ) <sup>g</sup> |
|------------|----------------|--------------------------------------|----------------------------------------------------------------------|---------------|--------------------------------|----------------------------------------|-------------------------------------|---------------------------------------------------------------|------------------------------------------------------------------------|
| 0.00       | 0.0            | ~10                                  | 168.09                                                               | Anatase       | 9                              | 0.12                                   | 1.00                                | 2834.25                                                       | 16.86                                                                  |
| 1.15       | 1.5            | ~15                                  | 95.60                                                                | Anatase       | 37                             | 0.59                                   | 1.19                                | 4013.50                                                       | 41.97                                                                  |
| 2.30       | 3.0            | ~15                                  | 95.62                                                                | Anatase       | 48                             | 0.92                                   | 1.24                                | 5826.50                                                       | 60.95                                                                  |
| 3.45       | 4.5            | ~20                                  | 93.00                                                                | Anatase       | 56                             | 1.27                                   | 1.31                                | 4296.00                                                       | 46.19                                                                  |
| 4.60       | 6.0            | ~40                                  | 62.20                                                                | Anatase       | 74                             | 2.85                                   | 1.47                                | 2061.25                                                       | 33.15                                                                  |
| 6.90       | 9.0            | ~60                                  | 37.60                                                                | Anatase       | 84                             | 5.25                                   | 1.59                                | 1774.00                                                       | 47.18                                                                  |

<sup>a</sup> determined by a statistical method from their high-magnification TEM results.

<sup>b</sup> determined by the BET method under typical testing conditions.

<sup>c</sup> determined by a statistical method from their high-magnification SEM and TEM results according to previous studies (Yu et al., J. Am. Chem. Soc. **2014**, 136, 8839-8842; Liu et al., ACS Catal. **2016**, 6, 1097-1108).

<sup>d</sup> calculated with the assumption that only the {001} and {101} facets were co-exposed on the surface of shape-tailored TiO<sub>2</sub> SCs prepared under the given solvothermal conditions.

<sup>e</sup> the relative intensity of diffraction peak from the anatase {101} facets (reference: the TiO<sub>2</sub> sample at F/Ti ratio of 0.00).

<sup>f</sup> data collected from Fig. 3a.

<sup>g</sup> the photochemical H<sub>2</sub> generation on the per m<sup>2</sup> surface of the shape-tailored TiO<sub>2</sub> SCs.

**Table S2** Parameters in the simulated results of EIS spectra for TiO<sub>2</sub> SCs with different {001}/{101} exposed ratios.<sup>a</sup>

| F/Ti ratio | Testing condition |    | R <sub>s</sub> (Ω cm <sup>-2</sup> ) <sup>c</sup> | Q <sub>h</sub> (Ssec <sup>n</sup> cm <sup>-2</sup> ) <sup>c</sup> | n <sup>c</sup> | R <sub>ct</sub> (kΩ cm <sup>-2</sup> ) <sup>c</sup> | Z <sub>w</sub> (Ssec <sup>0.5</sup> cm <sup>-2</sup> ) <sup>c</sup> | C <sub>ti</sub> /Q <sub>ti</sub> (Ssec <sup>n</sup> cm <sup>-2</sup> ) <sup>c</sup> | n <sup>c</sup> | R <sub>ti</sub> <sup>c</sup> |
|------------|-------------------|----|---------------------------------------------------|-------------------------------------------------------------------|----------------|-----------------------------------------------------|---------------------------------------------------------------------|-------------------------------------------------------------------------------------|----------------|------------------------------|
|            | Bias (V)          | UV |                                                   |                                                                   |                |                                                     |                                                                     |                                                                                     |                |                              |
| 0.00       | OCP <sup>b</sup>  | ×  | 84.84                                             | 1.61×10 <sup>-2</sup>                                             | 0.87           | 177.07                                              | 0.63×10 <sup>-1</sup>                                               | 3.10×10 <sup>-5</sup>                                                               | /Cti           | 6.84                         |
|            | OCP <sup>b</sup>  | √  | 118.44                                            | 1.68×10 <sup>-2</sup>                                             | 0.83           | 155.82                                              | 0.80×10 <sup>-1</sup>                                               | 3.01×10 <sup>-5</sup>                                                               | /Cti           | 7.32                         |
| 1.15       | OCP <sup>b</sup>  | ×  | 95.76                                             | 1.65×10 <sup>-2</sup>                                             | 0.86           | 189.58                                              | 0.84×10 <sup>-1</sup>                                               | 2.72×10 <sup>-5</sup>                                                               | /Cti           | 7.90                         |
|            | OCP <sup>b</sup>  | √  | 116.76                                            | 1.74×10 <sup>-2</sup>                                             | 0.83           | 160.27                                              | 1.15×10 <sup>-1</sup>                                               | 2.95×10 <sup>-5</sup>                                                               | /Cti           | 7.31                         |
| 2.30       | OCP <sup>b</sup>  | ×  | 84.98                                             | 1.04×10 <sup>-2</sup>                                             | 0.83           | 143.05                                              | 0.56×10 <sup>-1</sup>                                               | 3.42×10 <sup>-5</sup>                                                               | /Cti           | 5.64                         |
|            | OCP <sup>b</sup>  | √  | 84.98                                             | 1.04×10 <sup>-2</sup>                                             | 0.85           | 143.05                                              | 0.56×10 <sup>-1</sup>                                               | 3.42×10 <sup>-5</sup>                                                               | /Cti           | 5.64                         |
| 3.45       | OCP <sup>b</sup>  | ×  | 89.04                                             | 1.47×10 <sup>-2</sup>                                             | 0.87           | 149.18                                              | 0.54×10 <sup>-1</sup>                                               | 3.06×10 <sup>-5</sup>                                                               | /Cti           | 7.07                         |
|            | OCP <sup>b</sup>  | √  | 89.04                                             | 1.47×10 <sup>-2</sup>                                             | 0.87           | 149.18                                              | 0.54×10 <sup>-1</sup>                                               | 3.06×10 <sup>-5</sup>                                                               | /Cti           | 7.07                         |
| 4.60       | OCP <sup>b</sup>  | ×  | 90.72                                             | 1.97×10 <sup>-2</sup>                                             | 0.88           | 134.73                                              | 0.35×10 <sup>-1</sup>                                               | 2.52×10 <sup>-5</sup>                                                               | 0.96           | 11.84                        |
|            | OCP <sup>b</sup>  | √  | 90.72                                             | 1.97×10 <sup>-2</sup>                                             | 0.88           | 134.73                                              | 0.35×10 <sup>-1</sup>                                               | 2.52×10 <sup>-5</sup>                                                               | 0.96           | 11.84                        |
| 6.90       | OCP <sup>b</sup>  | ×  | 107.52                                            | 2.01×10 <sup>-2</sup>                                             | 0.87           | 89.46                                               | 0.42×10 <sup>-1</sup>                                               | 2.05×10 <sup>-5</sup>                                                               | 0.98           | 7.89                         |
|            | OCP <sup>b</sup>  | √  | 107.52                                            | 2.01×10 <sup>-2</sup>                                             | 0.87           | 89.46                                               | 0.42×10 <sup>-1</sup>                                               | 2.05×10 <sup>-5</sup>                                                               | 0.98           | 7.89                         |
| 2.30       | +0.00             | ×  | 88.2                                              | 1.74×10 <sup>-2</sup>                                             | 0.85           | 203.53                                              | 1.71×10 <sup>-1</sup>                                               | 2.81×10 <sup>-5</sup>                                                               | /Cti           | 7.58                         |
|            | +0.00             | √  | 72.24                                             | 1.04×10 <sup>-2</sup>                                             | 0.85           | 185.64                                              | 2.21×10 <sup>-1</sup>                                               | 3.33×10 <sup>-5</sup>                                                               | /Cti           | 6.03                         |
| 2.30       | +0.10             | ×  | 79.8                                              | 1.52×10 <sup>-2</sup>                                             | 0.86           | 171.94                                              | 1.10×10 <sup>-1</sup>                                               | 3.68×10 <sup>-5</sup>                                                               | /Cti           | 6.24                         |
|            | +0.10             | √  | 72.24                                             | 1.20×10 <sup>-2</sup>                                             | 0.85           | 124.15                                              | 1.65×10 <sup>-1</sup>                                               | 3.87×10 <sup>-5</sup>                                                               | /Cti           | 5.12                         |

|      |       |   |       |                       |      |        |                        |                       |      |      |
|------|-------|---|-------|-----------------------|------|--------|------------------------|-----------------------|------|------|
| 2.30 | +0.20 | × | 78.12 | $1.70 \times 10^{-2}$ | 0.87 | 154.56 | $2.24 \times 10^{-1}$  | $3.57 \times 10^{-5}$ | /Cti | 5.94 |
|      | +0.20 | √ | 77.28 | $0.94 \times 10^{-2}$ | 0.88 | 96.76  | $3.07 \times 10^{-1}$  | $3.31 \times 10^{-5}$ | /Cti | 6.19 |
| 2.30 | +0.30 | × | 42.84 | $1.68 \times 10^{-2}$ | 0.83 | 110.96 | $2.34 \times 10^{-1}$  | $2.20 \times 10^{-5}$ | /Cti | 5.12 |
|      | +0.30 | √ | 76.44 | $1.24 \times 10^{-2}$ | 0.87 | 45.27  | $11.62 \times 10^{-1}$ | $3.92 \times 10^{-5}$ | /Cti | 5.13 |
| 2.30 | +0.40 | × | 88.2  | $0.96 \times 10^{-2}$ | 0.90 | 55.18  | $7.73 \times 10^{-1}$  | $2.60 \times 10^{-5}$ | /Cti | 7.84 |
|      | +0.40 | √ | 80.64 | $1.47 \times 10^{-2}$ | 0.89 | 25.87  | $27.66 \times 10^{-1}$ | $3.67 \times 10^{-5}$ | /Cti | 6.24 |
| 2.30 | +0.50 | × | 74.76 | $1.25 \times 10^{-2}$ | 0.88 | 41.07  | $17.32 \times 10^{-1}$ | $3.89 \times 10^{-5}$ | /Cti | 5.14 |
|      | +0.50 | √ | 82.32 | $0.92 \times 10^{-2}$ | 0.90 | 13.35  | $22.97 \times 10^{-1}$ | $4.03 \times 10^{-5}$ | /Cti | 5.11 |

<sup>a</sup> EIS testing conditions: the typical three-electrode system with the TiO<sub>2</sub> coated ITO glass as the working electrode, platinum sheet as the counter electrode and standard calomel electrode (SCE) as the reference electrode, electrochemical workstation (CHI 760D, CH Instrument, China), supporting electrolyte (0.1 M Na<sub>2</sub>SO<sub>4</sub> aqueous solution), voltage amplitude (5 mV), frequency range (10<sup>5</sup> ~ 10<sup>-2</sup> Hz), bias (OCP or +0.00 ~ +0.50 V/SCE), UV (500 W Xe arc lamp,  $\lambda < 420$  nm) and effective anode area (6.0 cm<sup>2</sup>).

<sup>b</sup> OCP: open-circuit potential under the given conditions.

<sup>c</sup> The equivalent circuit of the electrochemical and photo-electrochemical testing systems for EIS simulation was adopted from a similar literature (Xiao et al., *Electrochem. Commun.* **2007**, 9, 2441-2447). R<sub>s</sub>: bulk electrolyte resistance. Q<sub>h</sub>: electrochemical double-layer capacitance. R<sub>ct</sub>: charge-transfer resistance. Z<sub>w</sub>: Warburg impedance. R<sub>ti</sub>/Q<sub>ti</sub> is associated with the conductivity and capacitance of the TiO<sub>2</sub> modified electrodes. The constant phase element (CPE) Q can replace the electrochemical double-layer capacitance at the electrode-electrolyte interface.

The impedance of CPE is given by  $Q = \frac{1}{Y(j\omega)^n}$ , where Y is the admittance magnitude of CPE and n is the exponent related to the phase angle  $\varphi = n(\pi/2)$ .

**Table S3** Averaged Mulliken population (in *electron*) of one Ti atom and two O atoms on the {001} and {101} facets of shape-tailored anatase TiO<sub>2</sub> SCs using the *co-exposed* and *slab* calculation models, comparatively.

|                | <b>{101} facet</b> |            | <b>{001} facet</b> |            |
|----------------|--------------------|------------|--------------------|------------|
|                | Co-exposed model   | Slab model | Co-exposed model   | Slab model |
| Ti             | +1.423             | +1.463     | +1.385             | +1.398     |
| O <sub>1</sub> | -0.581             | -0.595     | -0.676             | -0.685     |
| O <sub>2</sub> | -0.797             | -0.811     | -0.701             | -0.735     |
| Net population | +0.045             | +0.057     | +0.008             | -0.022     |

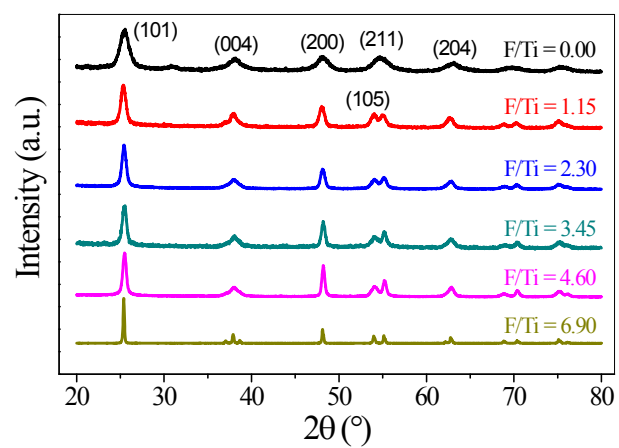

**Fig. S1** XRD patterns of the shape-tailored TiO<sub>2</sub> single crystals with different HF dosages (F/Ti = 0.00 ~ 6.90).

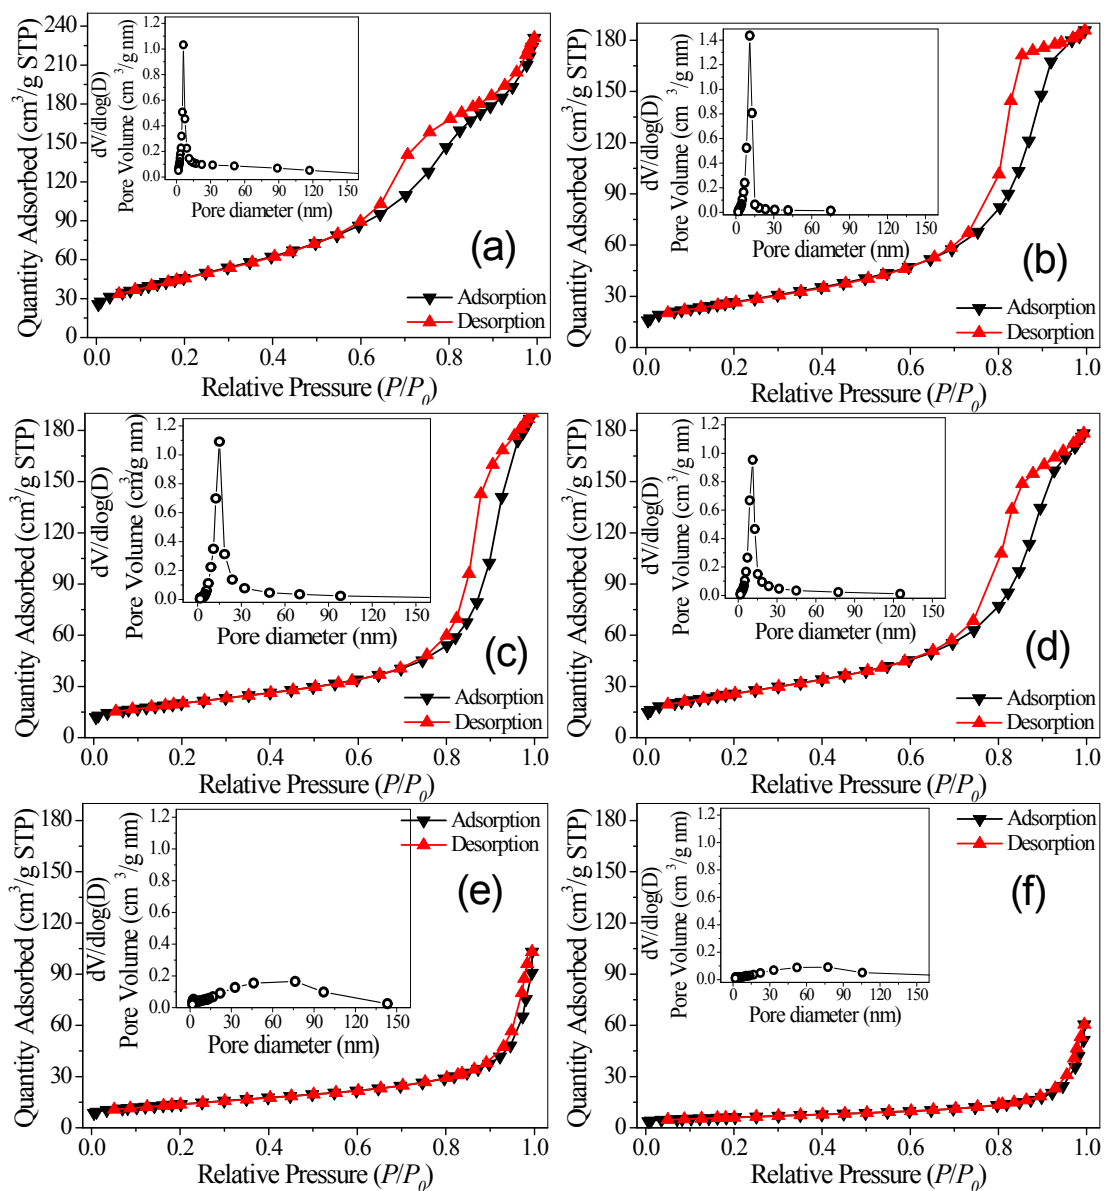

**Fig. S2** BET spectra of the shape-tailored  $\text{TiO}_2$  single crystals prepared with different HF dosages:  $\text{F/Ti} = 0.00$  (a),  $\text{F/Ti} = 1.15$  (b),  $\text{F/Ti} = 2.30$  (c),  $\text{F/Ti} = 3.45$  (d),  $\text{F/Ti} = 4.50$  (e) and  $\text{F/Ti} = 6.90$  (f).

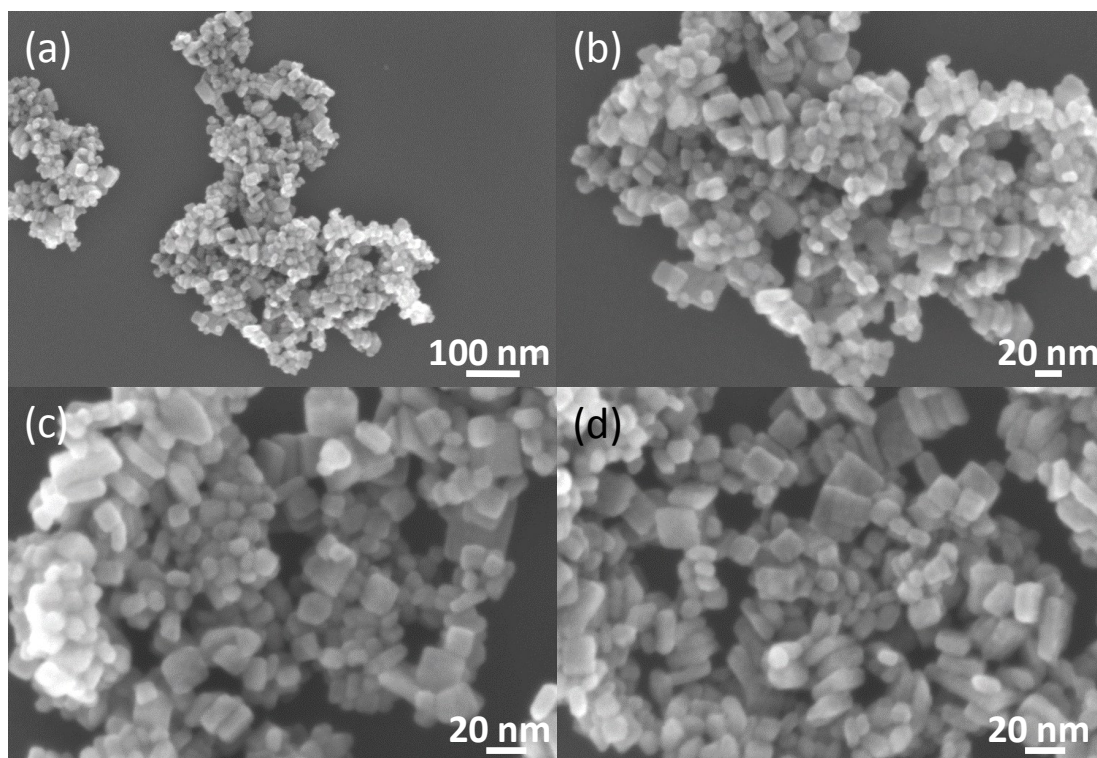

**Fig. S3** Typical SEM images of the shape-tailored TiO<sub>2</sub> single crystals prepared with F/Ti = 2.30 at different magnifications (a-d).

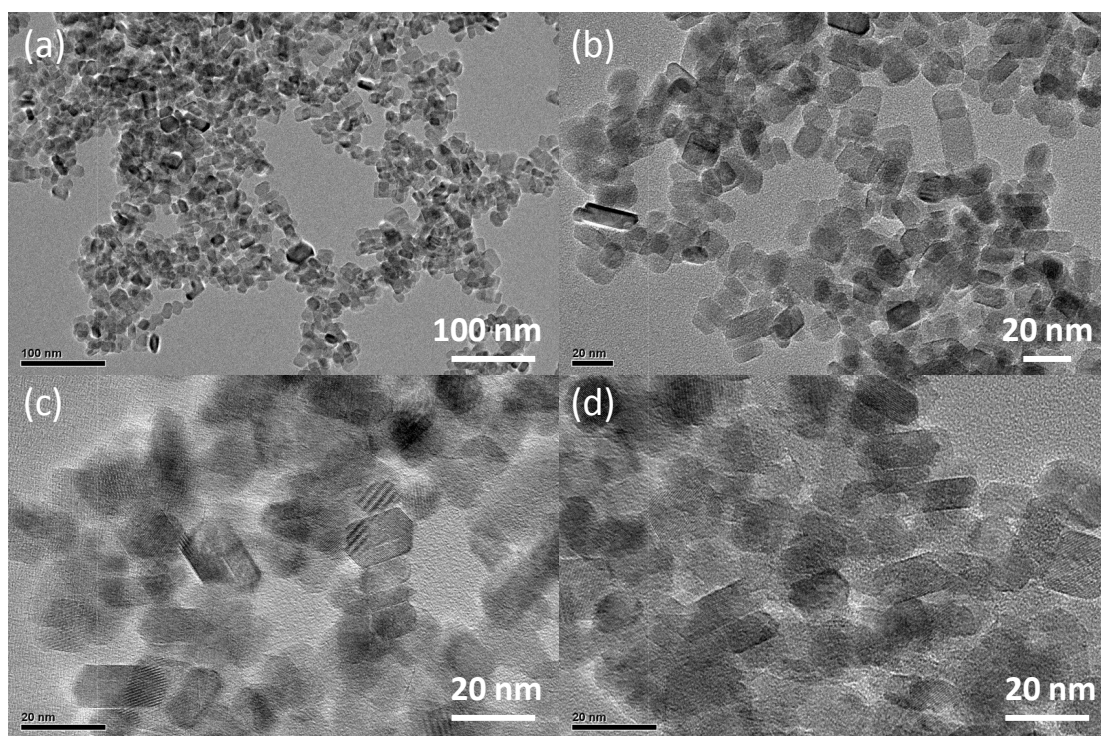

**Fig. S4** Typical TEM images of the shape-tailored  $\text{TiO}_2$  single crystals prepared with  $\text{F}/\text{Ti} = 2.30$  at different magnifications (a-d).

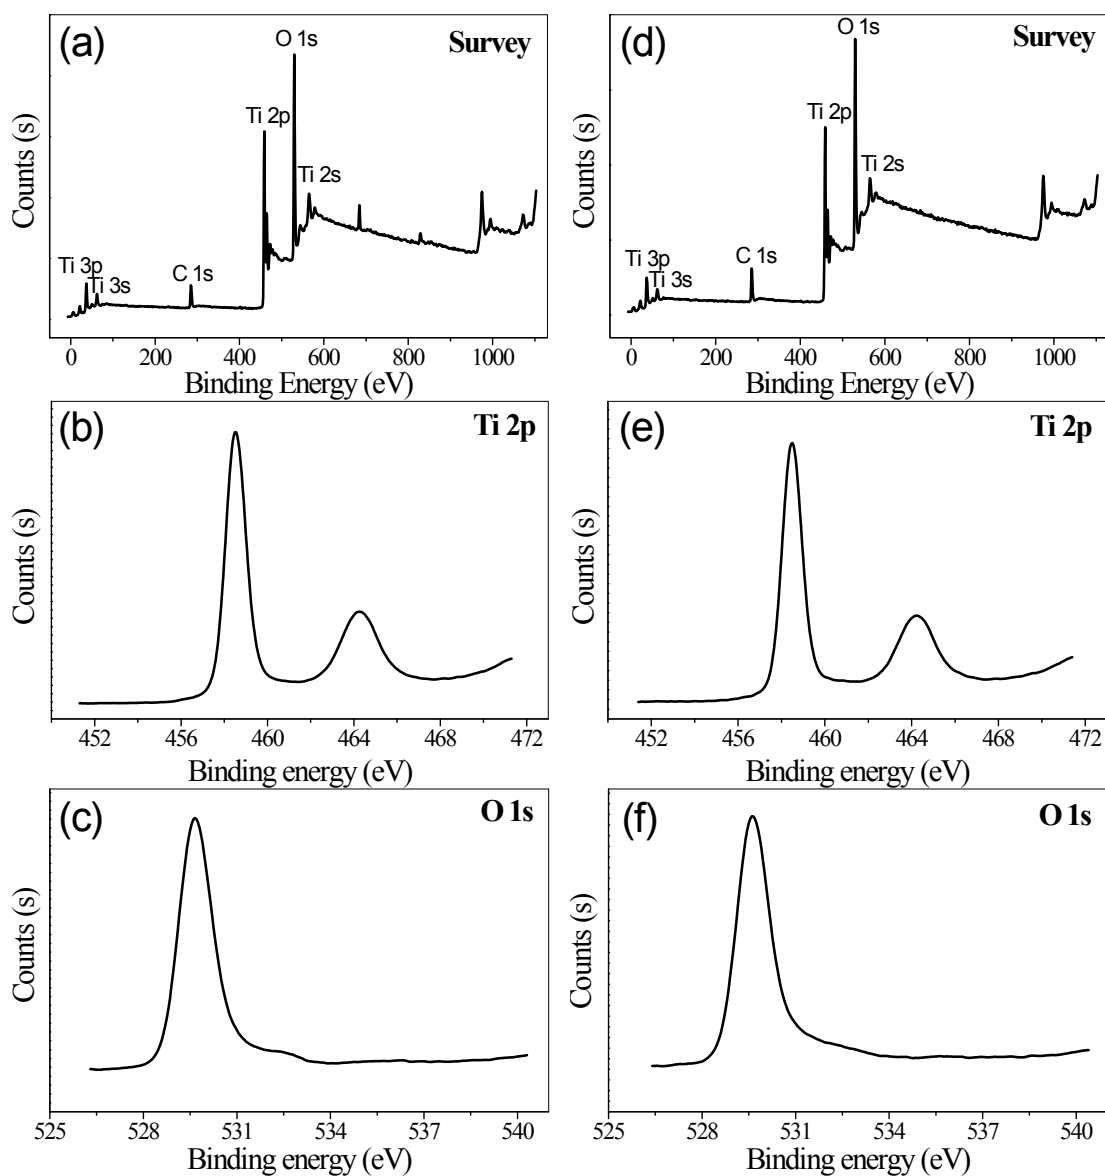

**Fig. S5** XPS spectra of the shape-tailored  $\text{TiO}_2\text{-}\{101\}/\{001\}$  (F/Ti = 2.30) (a, b and c) and  $\text{TiO}_2\text{-}\{101\}$  benchmark (F/Ti = 0.00) (d, e and f).

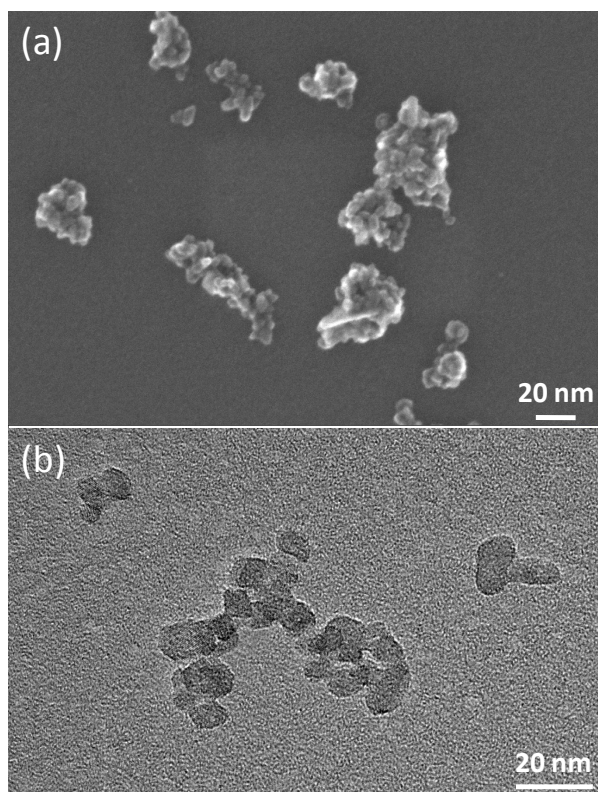

**Fig. S6** Typical SEM and TEM images of the  $\text{TiO}_2$ -{101} benchmark ( $\text{F}/\text{Ti} = 0.00$ ).

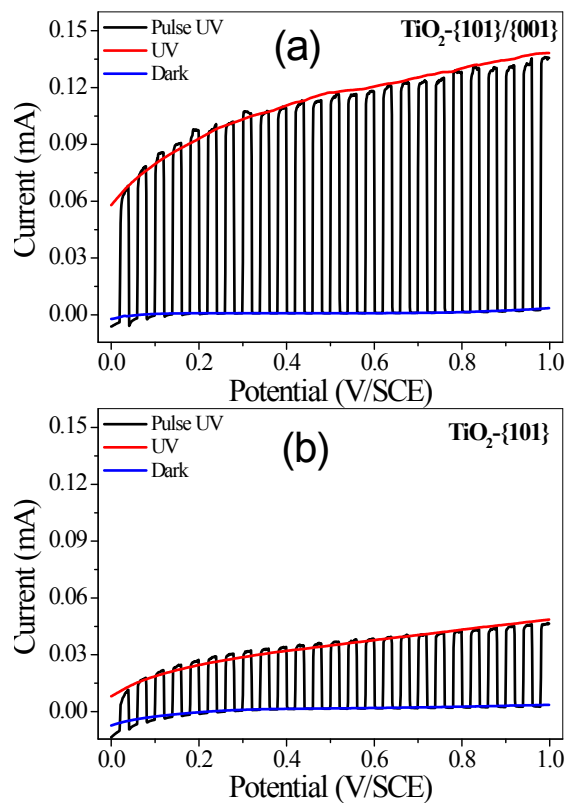

**Fig. S7** Linear sweep voltammograms and transient current response to illumination on-off cycles at anodic potential from 0.0 to 1.0 V (V/SCE) at a scan rate of  $5 \text{ mV s}^{-1}$  with Pt as the counter electrode on  $\text{TiO}_2\text{-}\{101\}/\{001\}$  (F/Ti = 2.30) and  $\text{TiO}_2\text{-}\{101\}$  (F/Ti = 0.00) electrodes.

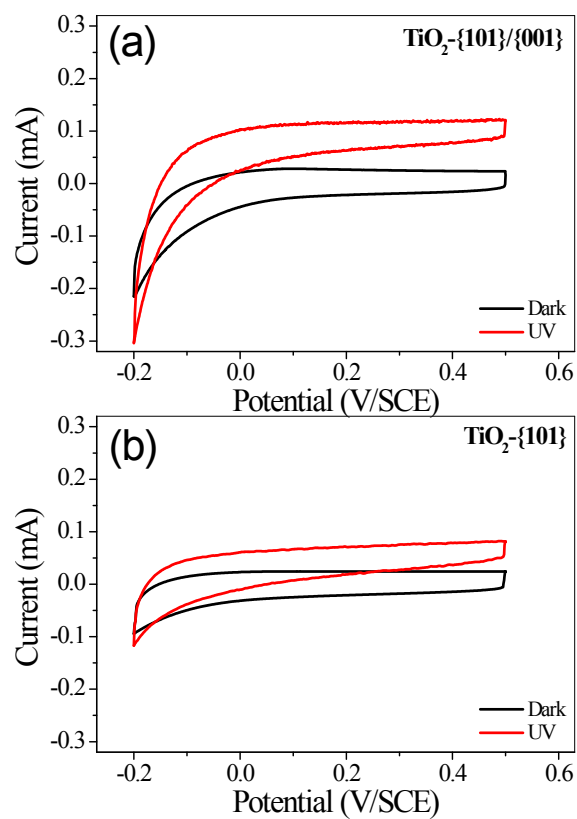

**Fig. S8** Cyclic voltammetry from -0.2 to +0.5 V (V/SCE) on the  $\text{TiO}_2$ -{101}/{001} (F/Ti = 2.30) and  $\text{TiO}_2$ -{101} (F/Ti = 0.00) electrodes at a scan rate of  $50 \text{ mV s}^{-1}$  with Pt as the counter electrode in the dark and under UV irradiation.

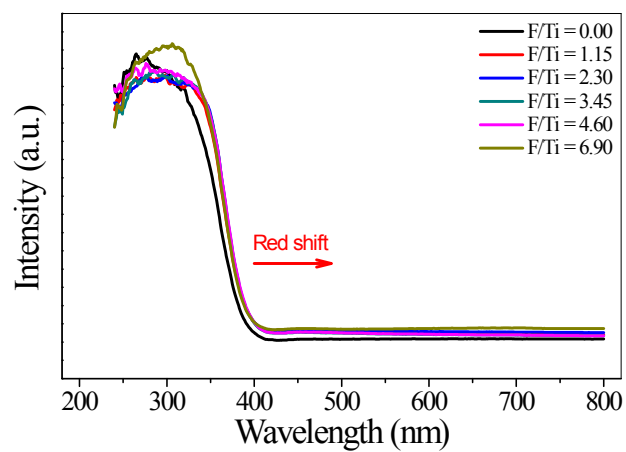

**Fig. S9** DRS spectra of the shape-tailored TiO<sub>2</sub> single crystals prepared with different HF dosages (F/Ti = 0.00 ~ 6.90).

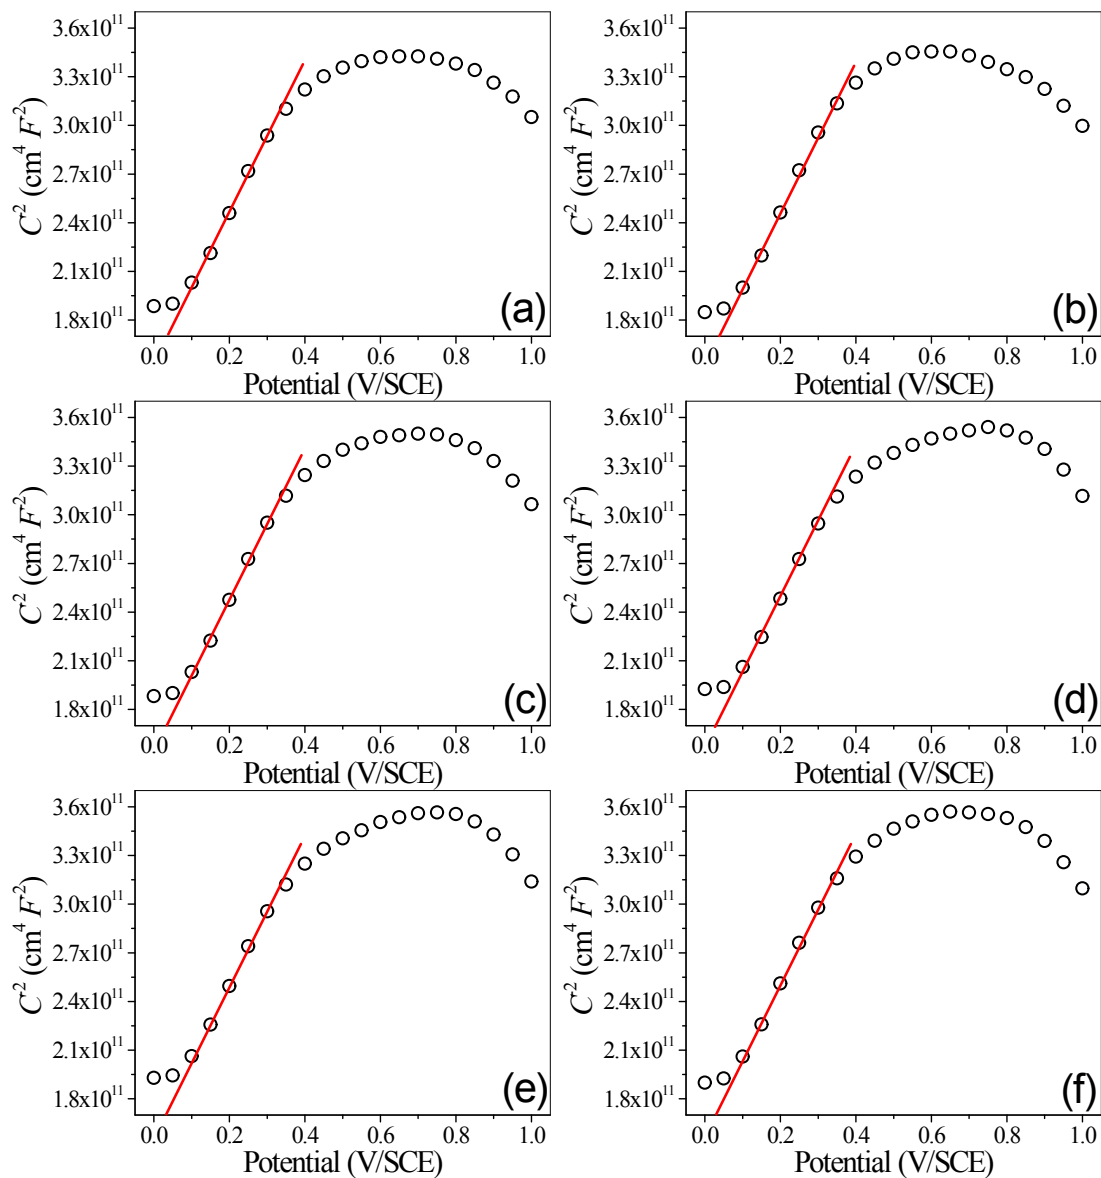

**Fig. S10** Mott-Schottky (MS) plots of the shape-tailored  $\text{TiO}_2$  single crystals prepared with different HF dosages:  $\text{F/Ti} = 0.00$  (a),  $\text{F/Ti} = 1.15$  (b),  $\text{F/Ti} = 2.30$  (c),  $\text{F/Ti} = 3.45$  (d),  $\text{F/Ti} = 4.50$  (e) and  $\text{F/Ti} = 6.90$  (f). Testing conditions: three-electrode system, electrolyte (0.1 M  $\text{Na}_2\text{SO}_4$  aqueous solution), frequency (1000 Hz) and voltage (-0.50 to 1.0 V).

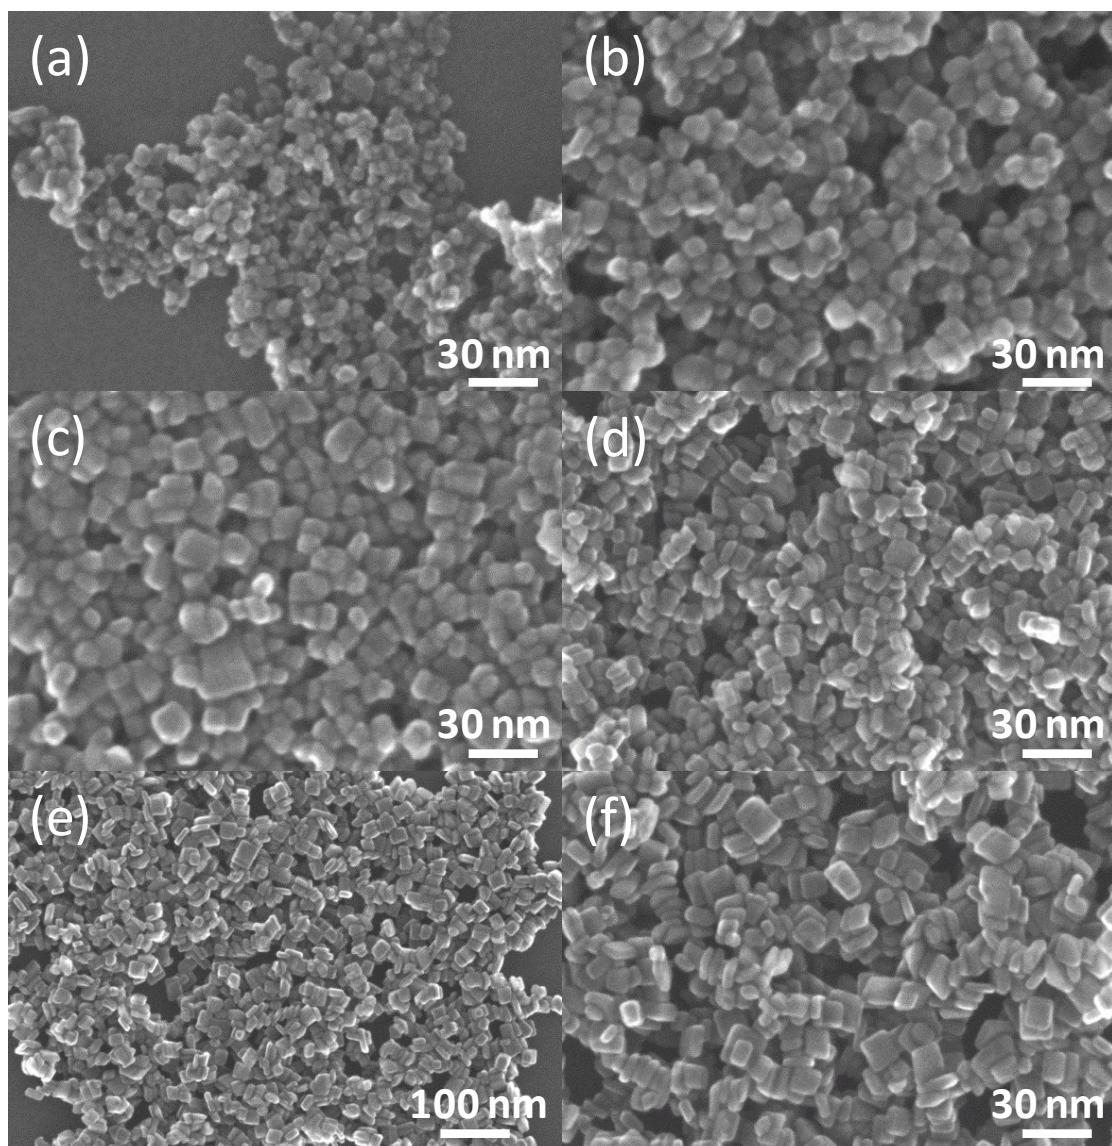

**Fig. S11** Typical SEM images of the shape-tailored TiO<sub>2</sub> single crystals prepared with different HF dosages: F/Ti = 0.00 (a), F/Ti = 1.15 (b), F/Ti = 2.30 (c), F/Ti = 3.45 (d) and F/Ti = 4.60 (e, f).

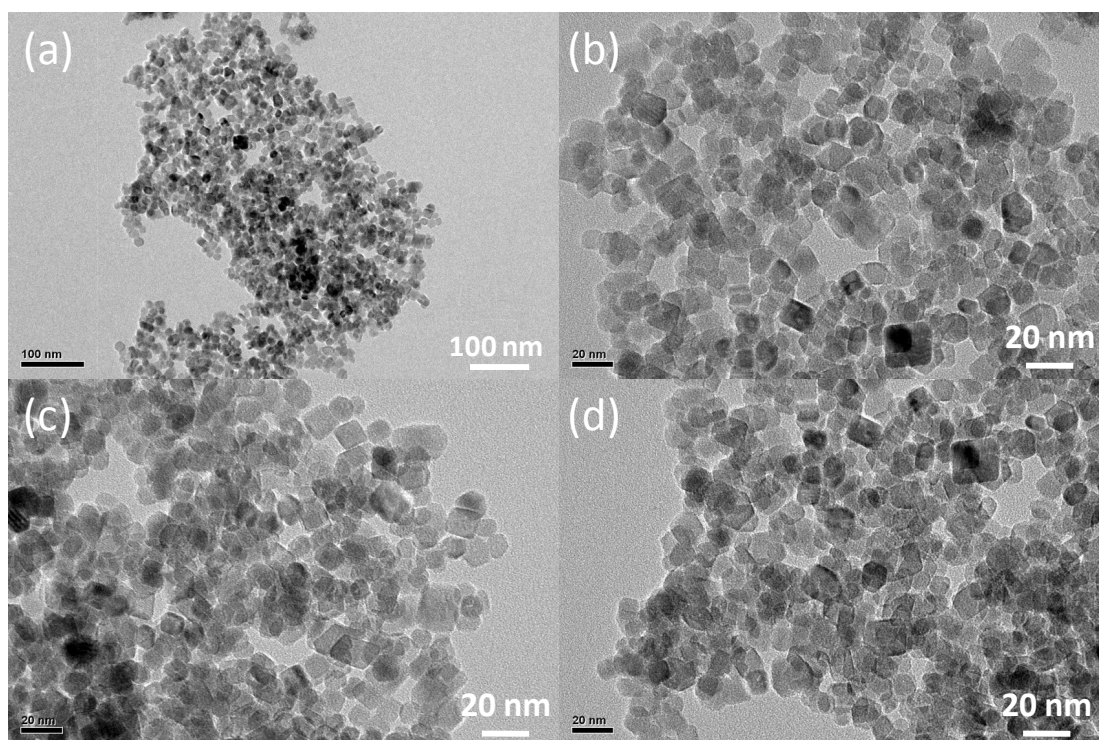

**Fig. S12** Typical TEM images of the anatase TiO<sub>2</sub> sample prepared with F/Ti = 1.15 at different magnifications (a-d).

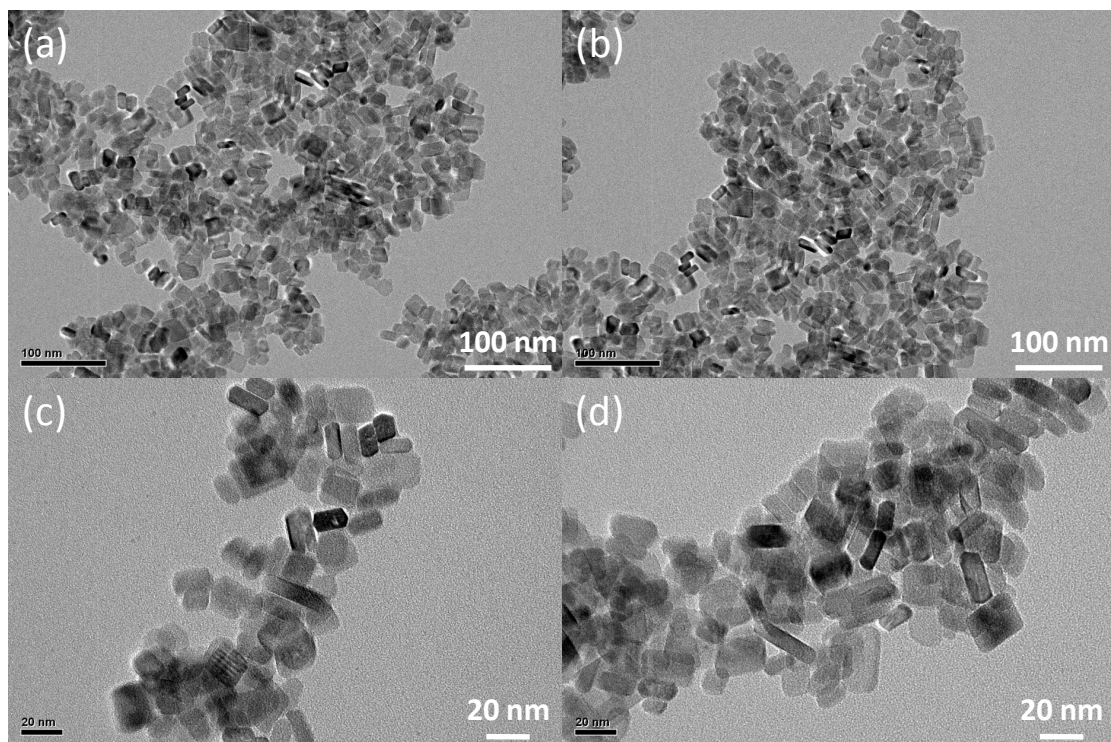

**Fig. S13** Typical TEM images of the anatase TiO<sub>2</sub> sample prepared with F/Ti = 3.45 at different magnifications (a-d).

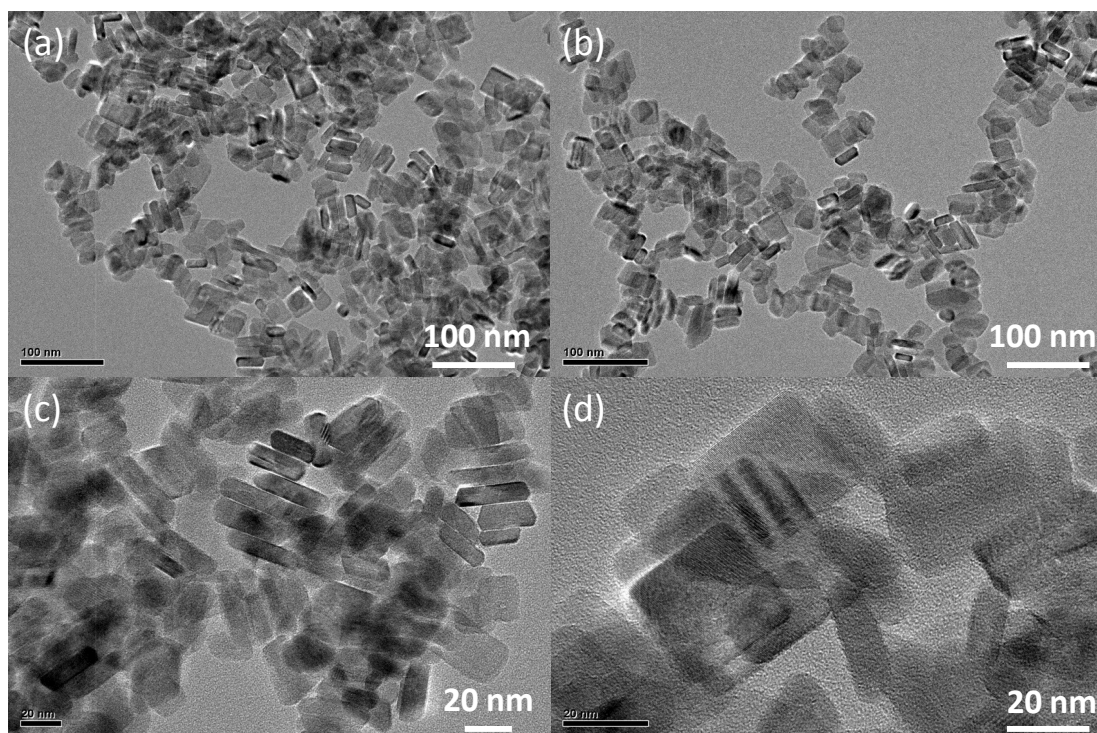

**Fig. S14** Typical TEM images of the anatase TiO<sub>2</sub> sample prepared with F/Ti = 4.60 at different magnifications (a-d).

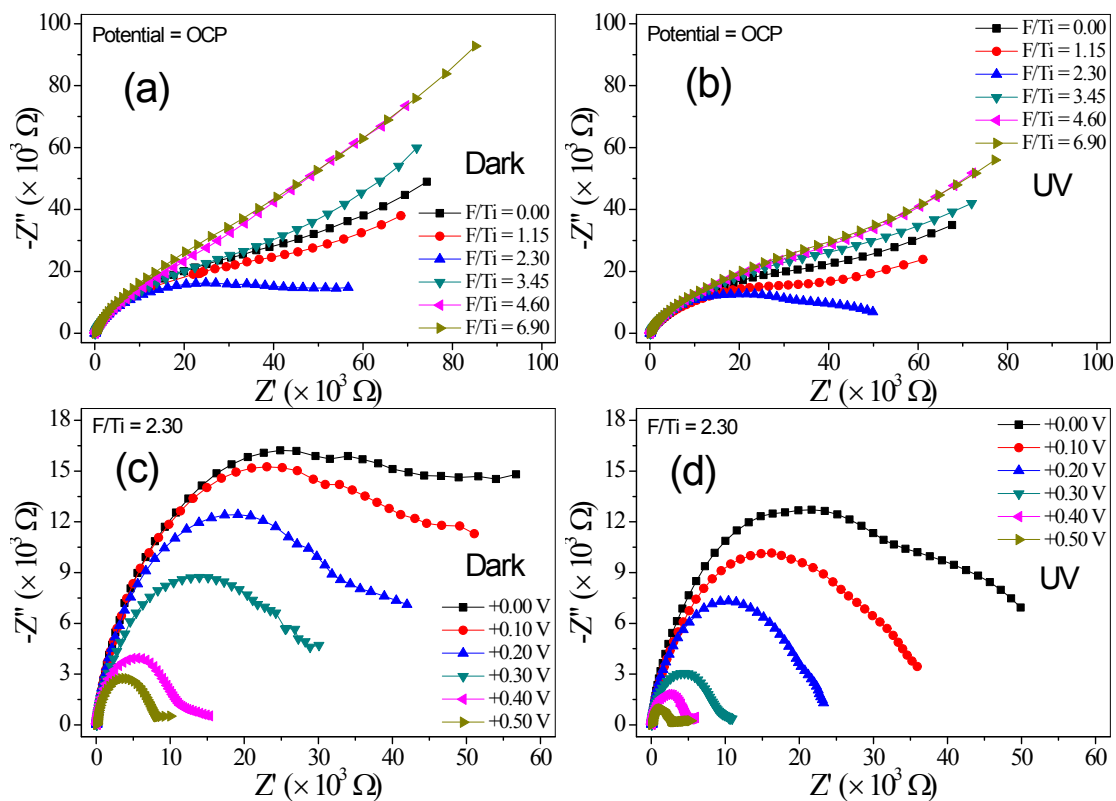

**Fig. S15** Electrochemical impedance spectroscopy of  $\text{TiO}_2$  samples prepared with different HF dosages ( $F/\text{Ti} = 0.00 \sim 6.90$ ) in dark (a,c) and UV irradiation (b,d) at different anodic bias (V/SCE).

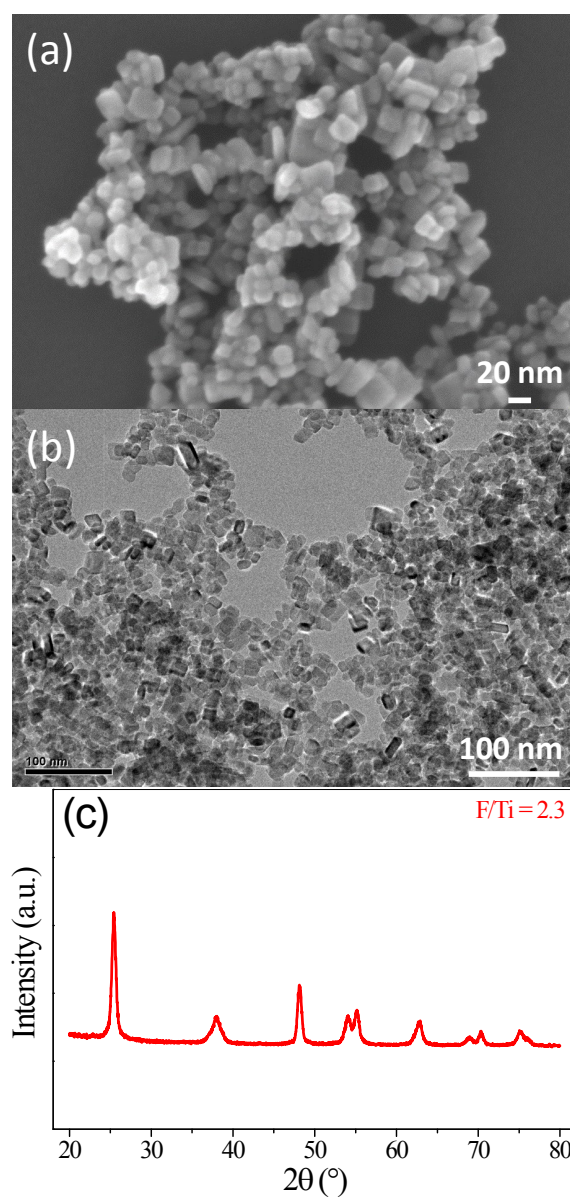

**Fig. S16** SEM (a), TEM (b) and XRD patterns (c) of the used TiO<sub>2</sub> single crystals prepared with F/Ti = 2.30 after 5-run cyclic tests for photochemical water splitting.

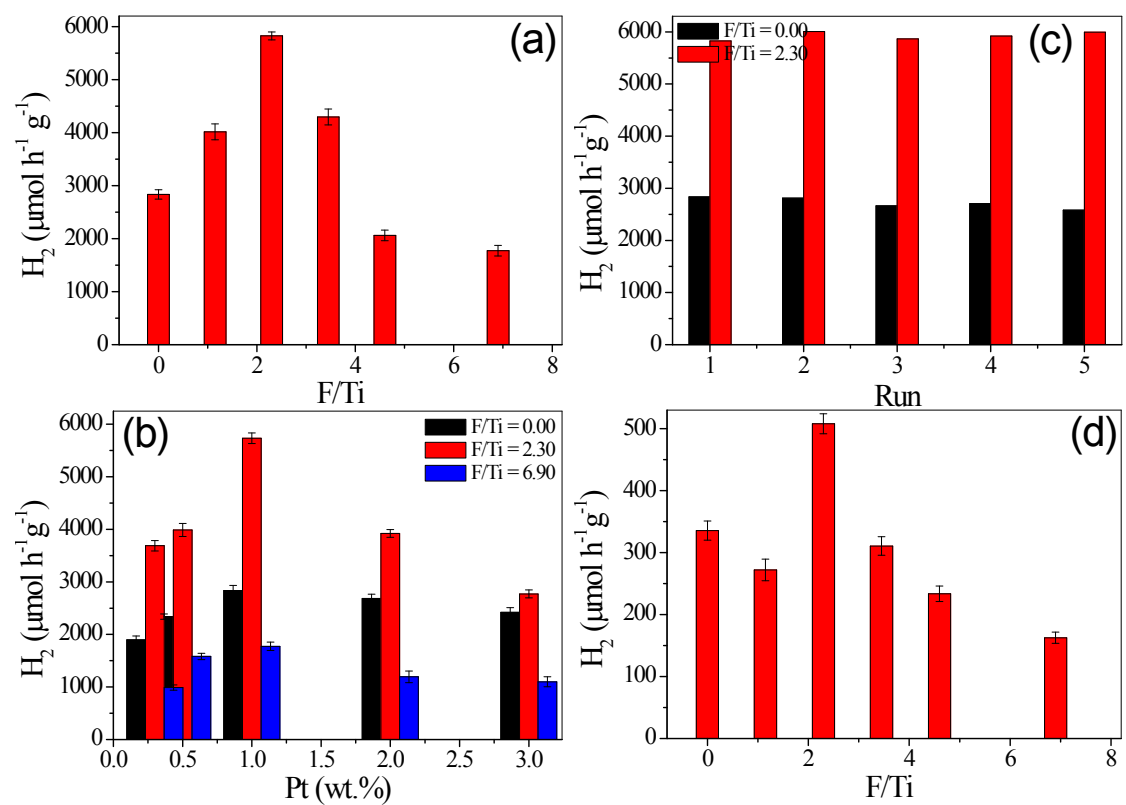

**Fig. S17** Photochemical H<sub>2</sub> evolution rates on the TiO<sub>2</sub>-{101}/{001} (F/Ti = 1.15 ~ 6.90) and TiO<sub>2</sub>-{101} (F/Ti = 0.00) with (a-c) and without Pt cocatalyst (d).

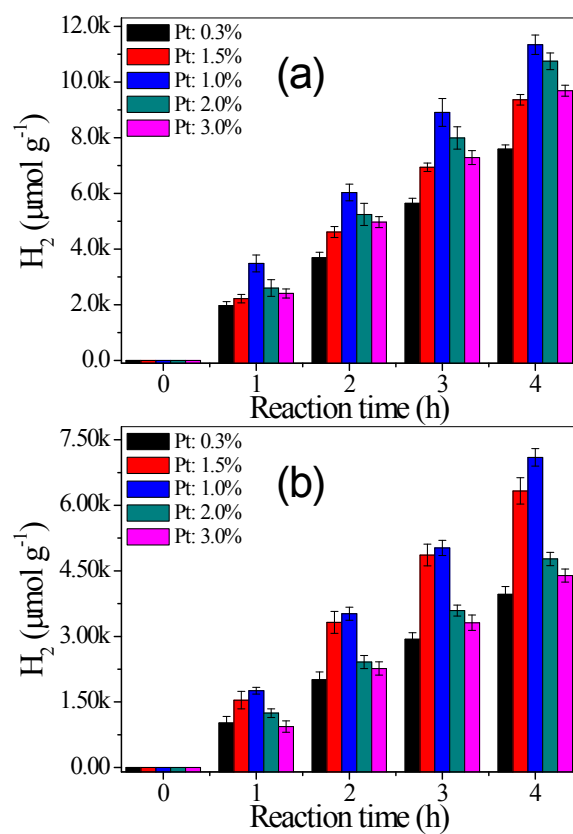

**Fig. S18** Photochemical water splitting on  $\text{TiO}_2$ -{101} (F/Ti = 0.00) (a) and  $\text{TiO}_2$ -{101}/{001} (F/Ti = 6.90) (b) with Pt cocatalyst at different amounts.

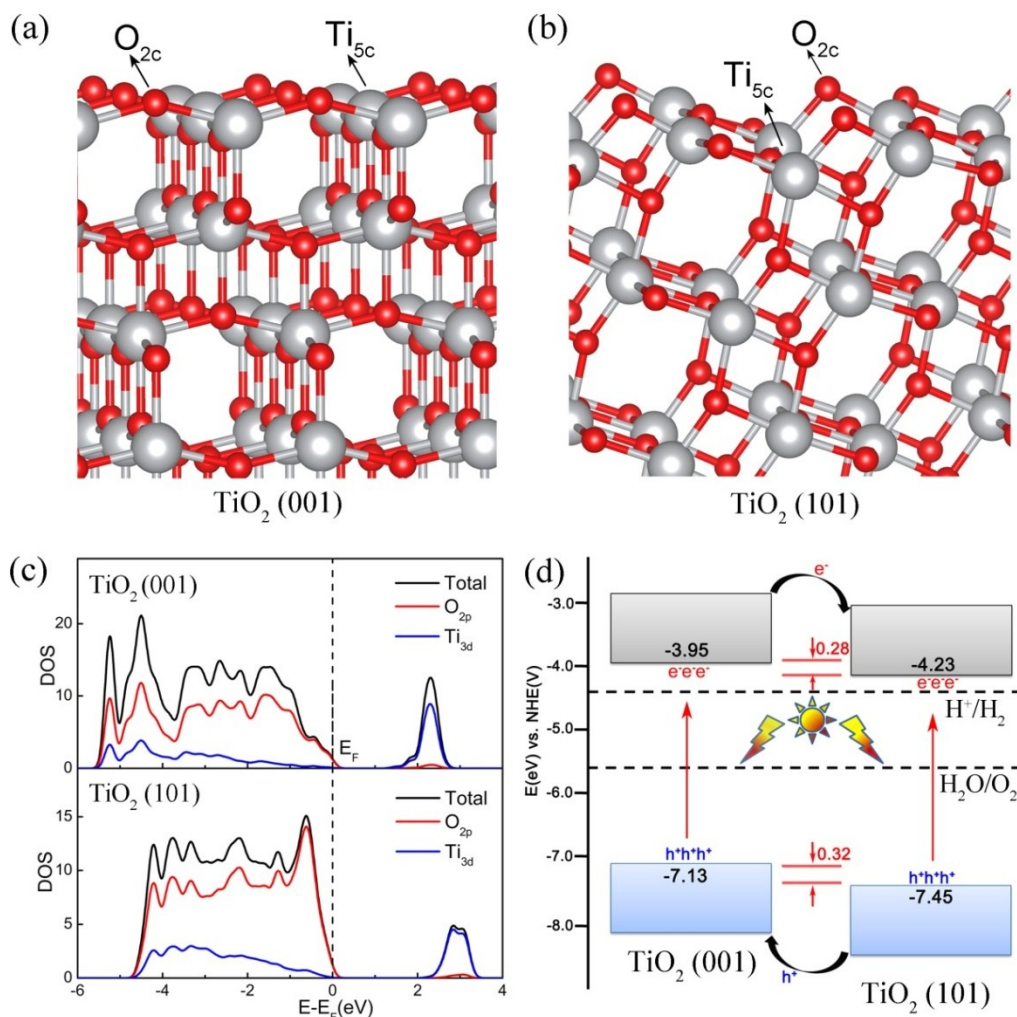

**Fig. S19** Schematic illustration of the {001} facet (a), {101} facet (b) of anatase TiO<sub>2</sub> single crystals, calculated density of states (c) and edge alignment between the isolated {001} and {101} facets (d).

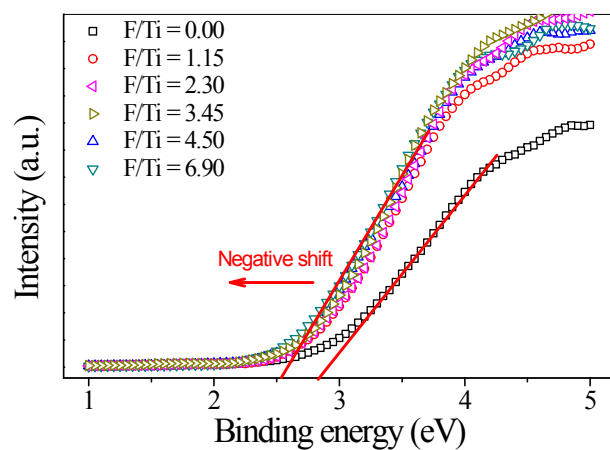

**Fig. S20** Valance-band XPS spectra of the shape-tailored  $\text{TiO}_2$  single crystals prepared with different HF dosages:  $\text{F/Ti} = 0.00$  (a),  $\text{F/Ti} = 1.15$  (b),  $\text{F/Ti} = 2.30$  (c),  $\text{F/Ti} = 3.45$  (d),  $\text{F/Ti} = 4.50$  (e) and  $\text{F/Ti} = 6.90$  (f).

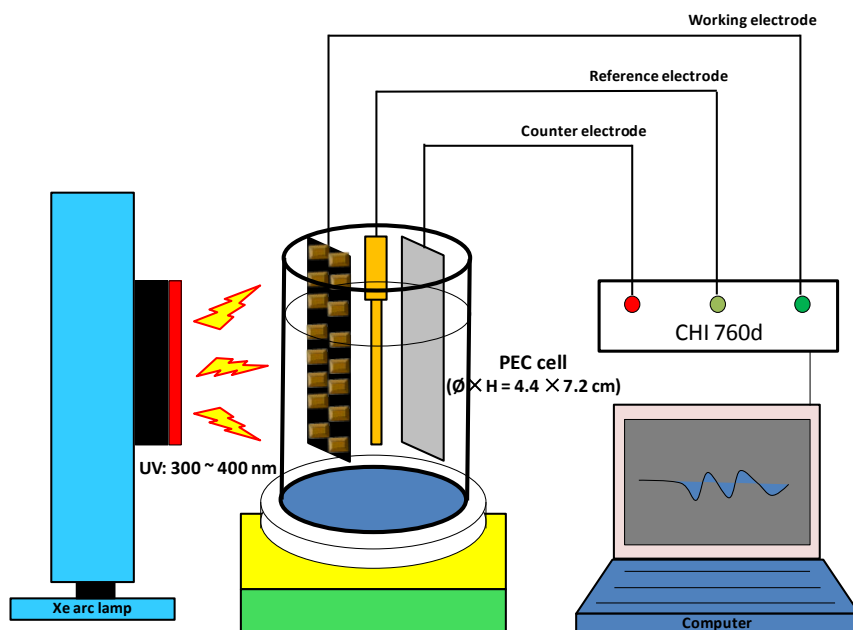

**Scheme S1** Schematic diagram of the electrochemical and the photo-electrochemical testing systems.
